# Supplementary material for: Conjugation of two complementary anti-cancer drugs confers molecular hydrogels as a co-delivery system
Source: Royal Society of Chemistry journal article supplement (doi:10.1039/c1cc16250k), 2011-11-05
Supplement: c1cc16250k.pdf [file c1cc16250k.pdf]

## Supporting Information

### Materials and general methods:

**Chemicals:** Fmoc-amino acids were obtained from GL Biochem (Shanghai). All the other Starting materials were obtained from *Alfa*. Commercially available reagents were used without further purification, unless noted otherwise. Nanopure water was used for all experiments. All other chemicals were reagent grade or better.

**General methods:** The synthesized compounds were characterized using  $^1\text{H}$  NMR (Bruker ARX 300) using DMSO- $\text{d}_6$  as the solvent and ESI-MS spectrometric analyses were performed at the Thermo Finnigan LCQ AD System. HPLC was conducted at LUMTECH HPLC (Germany) system using a C18 RP column with MeOH (0.1% of TFA) and water (0.1% of TFA) as the eluents, TEM samples were prepared as following: a copper coated with a thin layer of carbon layer was dipped into the hydrogel, and then it was kept in a desicator overnight. The dried sample was performed at the Tecnai G2 F20 system, operating at 200 kV, LC-MS was conducted at the LCMS-20AD (Shimadzu) system, and rheology was performed on an AR 1500ex (TA instrument) system using a parallel plates (40 mm) at the gap of 500  $\mu\text{m}$ . ARES 1500ex can not control the strain when the mechanical strength ( $G'$  value) of the sample is low. For example, for a solution sample with low viscosity, though we set the strain value to 1%, the machine can not control the strain and sometimes the strain will be 100% which will destroy the gels. Therefore, the Hgel needs to be incubated for 1 hour before measurement.

### Syntheses and characterizations:

The synthesis of Dex-FFFK(Taxol/HCPT)E-ss-EE is easy and straightforward. Fmoc-amino acids, Fmoc-succinated cystamine reported in our previous paper,<sup>13</sup> and succinated Dex were used for solid phase peptide synthesis to enable Dex-FFFKE-ss-EE to be purified by HPLC. Dex-FFFKE-ss-EE was then used to couple with N-hydroxysuccinimide (NHS), the active ester of HCPT/Taxol derivatives in high yields (>80% after HPLC purification). Such a simple synthetic pathway ensures large-scale preparation of the compounds for practical use.

**Preparation of Dex-SA:** 1.0 g (2.55 mmol) of Dexamethasone was dissolved in 30 mL of pyridine and 0.77 g (7.65 mmol) of succinic anhydride, 0.1 eq DMAP was then added. After being stirred at room temperature overnight, the mixture was evaporated under reduced pressure. The resulting residue was then treated with 40 mL of water. The mixture was stirred for 10 min and then centrifuged. The resulting precipitate was washed again with  $\text{H}_2\text{O}$ . White powder of the product was obtained in a yield of 86%.  $^1\text{H}$  NMR (300 MHz, DMSO- $\text{d}_6$ )  $\delta$  7.27(d,  $J=10.11$ , 1H), 6.19-6.24 (q, 1H), 5.99 (m, 1H), 5.42 (d, 1H), 5.17

(s, 1H), 4.99-5.06 (m, 1H), 4.75-4.82 (m, 1H), 4.10-4.15 (m, 1H), 2.82-2.91 (m, 1H), 2.58-2.61 (m, 3H), 2.26-2.40 (m, 3H), 2.09-2.18 (m, 2H), 1.53-1.79 (m, 6H), 1.05-1.096 (m, 1H). MS: calc.  $M^+ = 492.2$ , obsvd.  $(M+1)^+ = 493.1$ .

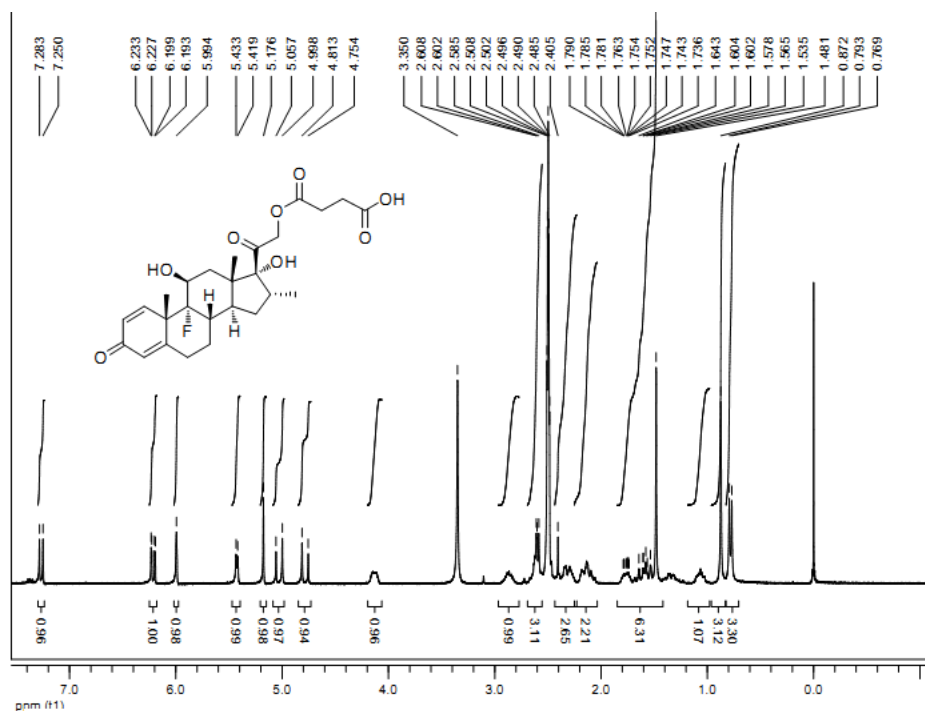

**Figure S-1.** <sup>1</sup>H NMR of Dex-SA

**Peptide Synthesis:** The peptide derivative was prepared by solid phase peptide synthesis (SPPS) using 2-chlorotrityl chloride resin, the corresponding N-Fmoc protected amino acids with side chains properly protected by a tert-butyl group, and Fmoc-succinated cystamine. The first amino acid was loaded on the resin at the C-terminal with the loading efficiency about 0.6 mmol/g. 20% piperidine in anhydrous N,N'-dimethylformamide (DMF) was used during deprotection of Fmoc group. Then the next Fmoc-protected amino acid was coupled to the free amino group using O-(Benzotriazol-1-yl)-N,N,N',N'-tetramethyluroniumhexafluorophosphate (HBTU) as the coupling reagent. The growth of the peptide chain was according to the established Fmoc SPPS protocol. At the final step, Dex-succ was used to attach on the peptide. After the last coupling step, excessive reagents were removed by a single DMF wash for 5 minutes (5 mL per gram of resin), followed by five steps of washing using DCM for 2 min (5 mL per gram of resin). The peptide derivative was cleaved using 95% of trifluoroacetic acid with 2.5% of TMS and 2.5% of H<sub>2</sub>O for 20 minutes. 20 mL per gram of resin of ice-cold diethylether was then added to cleavage reagent. The resulting precipitate was centrifuged for 10 min at room temperature at 10,000 rpm. Afterward the supernatant was decanted and the resulting solid was dissolved in DMSO for HPLC separation. <sup>1</sup>H NMR (400MHz, DMSO-d<sub>6</sub>) δ 8.02-8.17 (m, 9H), 7.15-7.31 (m, 15H), 6.21-6.25 (m, 1H), 6.01 (s, 1H), 5.40-5.42 (m, 1H), 5.16 (s, 1H), 4.98-5.03 (m, 1H), 4.72-4.77 (m, 1H), 4.56-4.59 (m, 1H),

4.45-4.49 (m, 3H), 4.24-4.29 (m, 4H), 4.13-4.15 (m, 2H), 2.95-3.06 (m, 3H), 2.84-2.88 (m, 3H), 2.72-2.76 (m, 6H), 2.62-2.68 (m, 3H), 2.41-2.44 (m, 2H), 2.22-2.34 (m, 12H), 2.12-2.19 (m, 3H), 1.88-1.93 (m, 3H), 1.73-1.81 (m, 3H), 1.61-1.68 (m, 3H), 1.48-1.56 (m, 7H), 1.30-1.34 (m, 3H), 1.03-1.09 (m, 1H), 0.87 (s, 3H), 0.78 (d,  $J=7.18$ , 3H). MS: calc.  $M^+ = 1682.7$ , obsvd.  $(M+1)^+ = 1683.6$ .

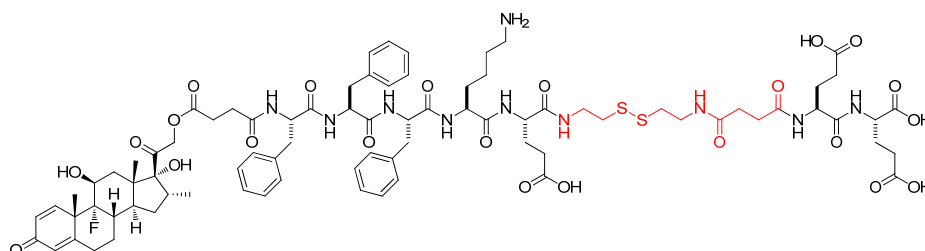

**Scheme S-1.** Chemical structure of Dex-FFFKE-ss-EE

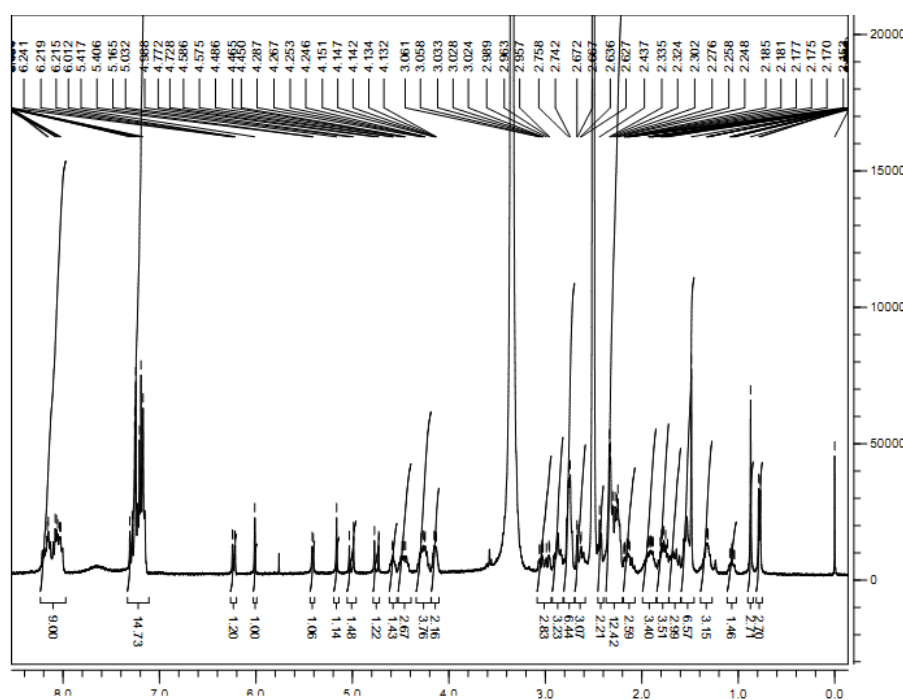

**Figure S-2.**  $^1\text{H}$  NMR of Dex-FFFKE-ss-EE

**Preparation of Taxol-SA:** 0.50 g (0.59 mmol) of paclitaxel was dissolved in 12 mL of pyridine and 0.90 g (7.6 mmol) of succinic anhydride was added. After being stirred 3 hrs at room temperature, the mixture was evaporated under reduced pressure, then treated with 20 mL of water, stirred for 20 min, and filtered. The precipitate was dissolved in acetone, water was then slowly added. 0.52 g of fine crystals were collected.<sup>1,2</sup> (Yield = 92.0%)

**Preparation of HCPT-GA:** a solution of 0.3g 10-hydroxycamptothecin (HCPT) and 0.282g Glutaric anhydride in 30 mL of pyridine was stirred for 48 hrs at room temperature. The reaction mixture was evaporated to dryness in vacuo. 0.01 M HCl (20 mL) was then added. The mixture was centrifuged and

the resulting precipitate was washed with HCl again. Yellow powder of the product was obtained in a yield of 94%.  $^1\text{H}$  NMR (400 MHz, DMSO- $d_6$ )  $\delta$  8.69 (s, 1H), 8.23 (d,  $J=9.23$ , 1H), 7.94-7.95 (m, 1H), 7.69-7.72 (m, 1H), 7.36 (s, 1H), 6.57 (s, 1H), 5.45 (s, 2H), 5.31 (s, 2H), 2.73-2.76 (t, 2H), 2.39-2.43 (t, 2H), 1.86-1.94 (m, 4H), 0.88-0.92 (m, 3H). MS: calc.  $M^+ = 478.1$ , obsvd.  $(M+1)^+ = 479.2$ .

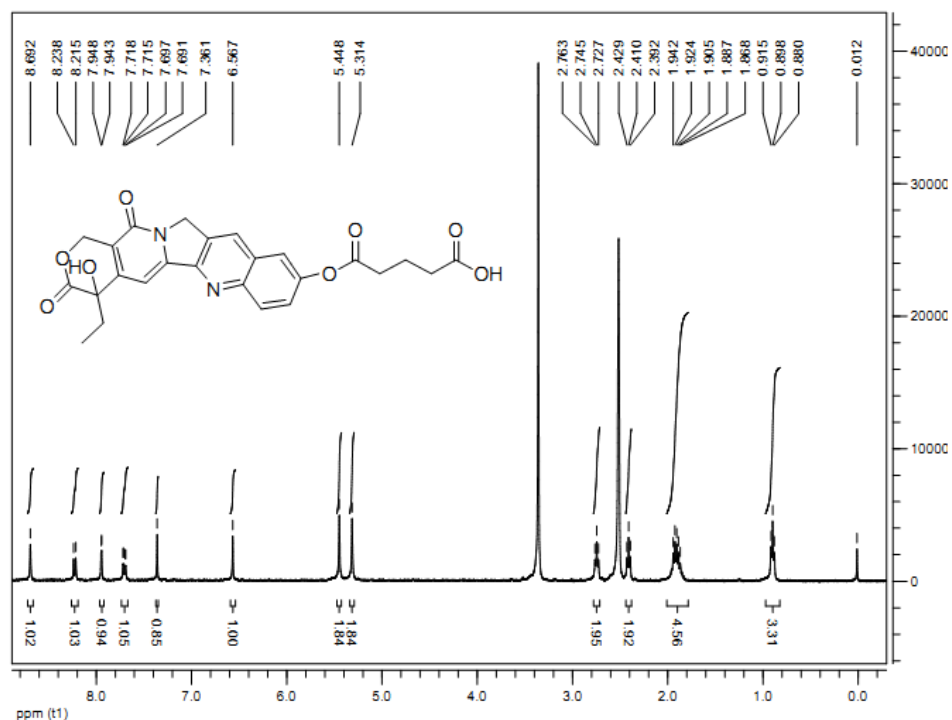

**Figure S-3.**  $^1\text{H}$  NMR of HCPT-GA

Precursors of gelators were synthesized according to Scheme S-2.

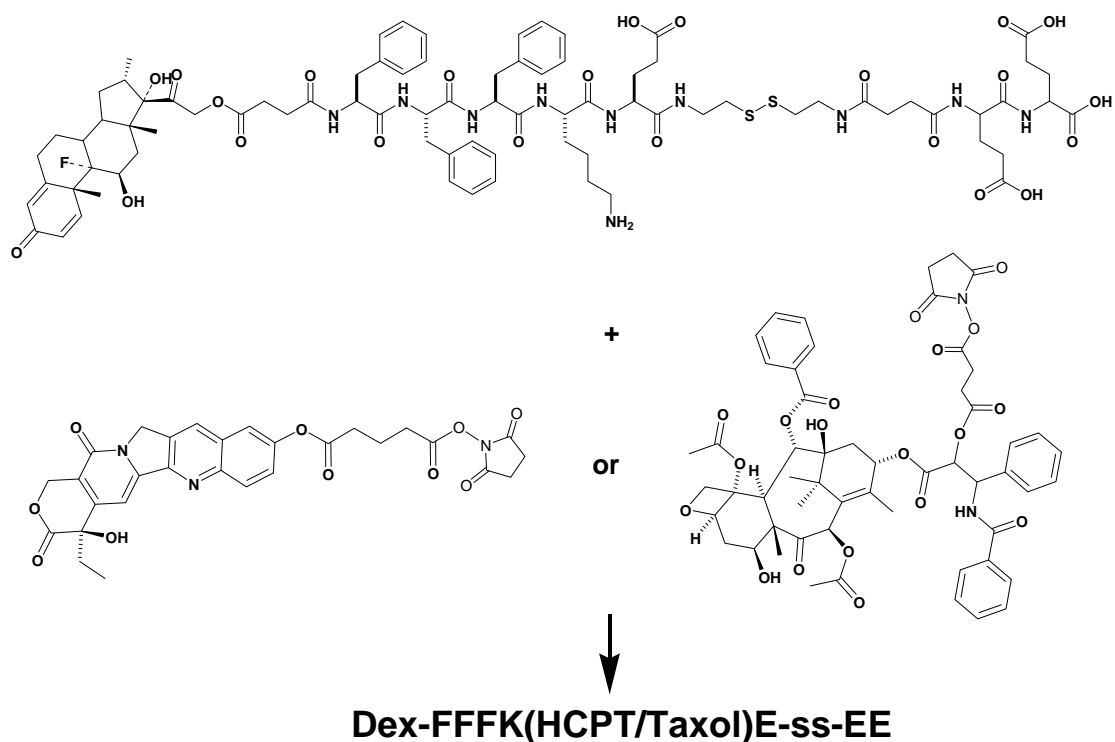

**Scheme S-2.** Synthetic route for precursors of gelators

**Preparation of Dex-FFFK(Taxol)E-ss-EE:** 60 mg of Taxol-SA (0.06 mmol) was dissolved in 10 mL of dichloromethane. 1.1 equiv. (7.6 mg, 0.066 mmol) of N-Hydroxysuccinimide, 14.8 mg (0.07 mmol) of N,N'-dicyclohexylcarbodiimide, and catalytic amount of 4-dimethylamipryridine were added. After being stirred 3hrs at room temperature, the solution was filtered to remove precipitation, dried and evaporated under reduced pressure to yield a white power. The white powder was used for the next step without further purification. The white powder obtained in last step was dissolved in 5 mL N,N-Dimethylformamide, 121 mg (0.07 mmol) of Dex-FFFK-E-ss-EE was then added with 50  $\mu$ L of N-Ethyl-diisopropylamine. After being stirred overnight, HPLC was used for purification to yield the title product in a yield of 86%.  $^1\text{H}$  NMR (400MHz, DMSO- $d_6$ )  $\delta$  8.12-8.19 (m, 4H), 8.02-8.09 (m, 4H), 7.97-7.99 (m, 3H), 7.86 (d, J=7.13, 1H), 7.72-7.76 (m, 1H), 7.64-7.67 (m, 2H), 7.54-7.58 (m, 1H), 7.48-7.50 (m, 2H), 7.44-7.47 (m, 4H), 7.28-7.31 (m, 1H), 7.24-7.26 (m, 4H), 7.16-7.20 (m, 12H), 6.30 (s, 1H), 6.21-6.24 (m, 1H), 6.01 (s, 1H), 5.80-5.85 (m, 1H), 5.51-5.55 (m, 1H), 5.40-5.42 (m, 2H), 5.33-5.35 (m, 1H), 5.17 (s, 1H), 4.99-5.04 (m, 1H), 4.90-4.95 (m, 2H), 4.73-4.78 (m, 1H), 4.64 (s, 1H), 4.59-4.61 (m, 1H), 4.44-4.50 (m, 2H), 4.23-4.28 (m, 3H), 4.09-4.17 (m, 4H), 3.98-4.03 (m, 2H), 3.55-3.58 (m, 2H), 3.17 (s, 1H), 2.82-3.07 (m, 8H), 2.72-2.78 (m, 6H), 2.59-2.66 (m, 5H), 2.41-2.44 (m, 3H), 2.29-2.39 (m, 13H), 2.23-2.25 (m, 7H), 2.10 (s, 3H), 1.88-1.99 (m, 4H), 1.72-1.83 (m, 7H), 1.57-1.74 (m, 5H), 1.49-1.50 (m, 8H), 1.32-1.36 (m, 3H), 1.24-1.28 (m, 2H), 0.99-1.10 (m, 8H), 0.88 (s, 3H), 0.78 (d, J=7.10, 3H). HR-MS: calc.  $M^+ = 2619.03$ , obsvd.  $(M+1)^+ = 2620.0383$ .

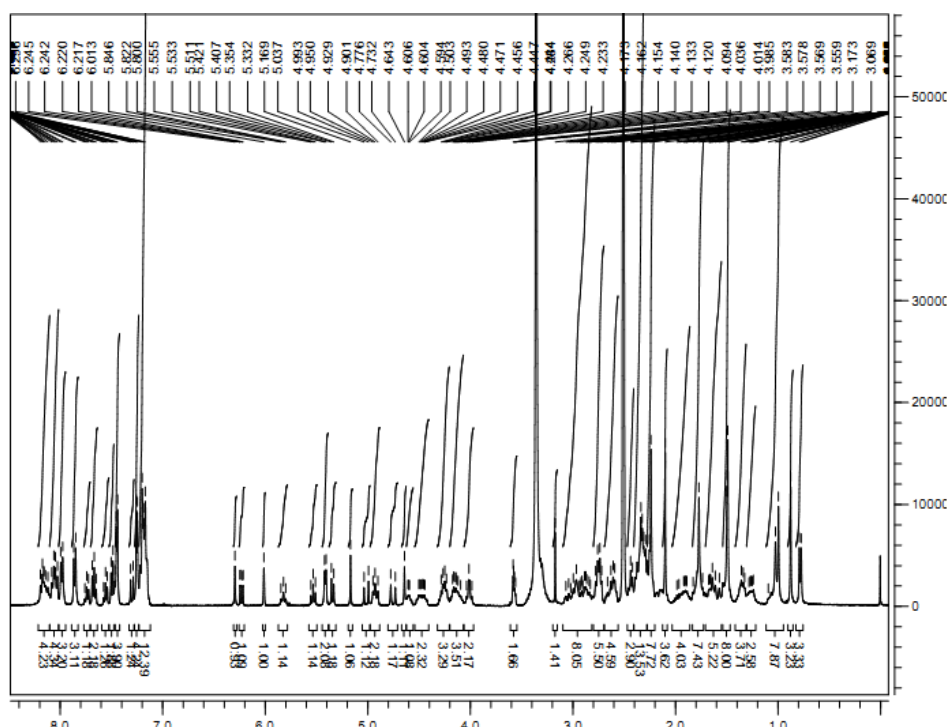

**Figure S-4.**  $^1\text{H}$  NMR of Dex-FFFK(Taxol)E-ss-EE

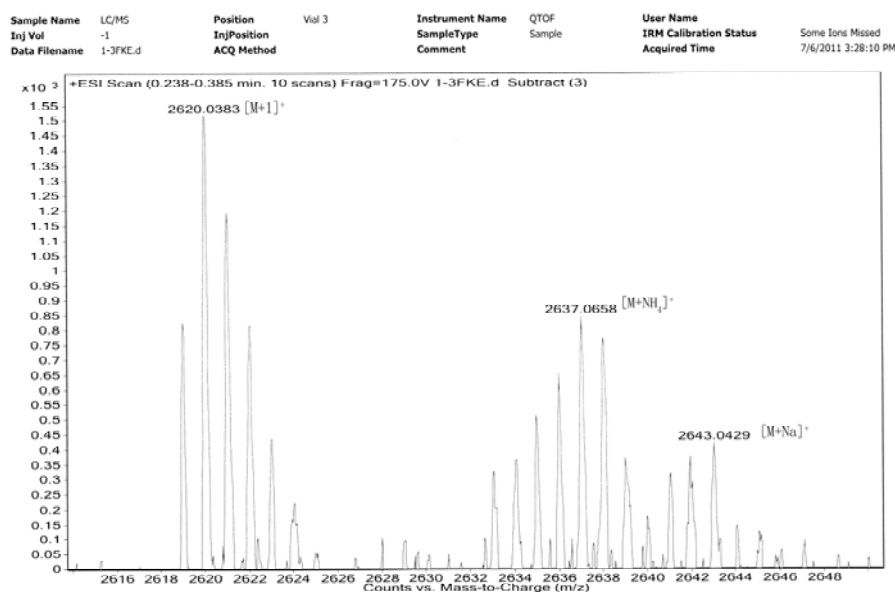

**Figure S-5.** HR-MS of Dex-FFFK(Taxol)E-ss-EE

**Preparation of Dex-FFFK(HCPT)E-ss-EE:** the same procedure for preparation of **Dex-FFFK(taxol)E-ss-EE** was used. The yield is 80%.  $^1\text{H}$  NMR (400MHz, DMSO- $d_6$ )  $\delta$  8.02-8.23 (m, 9H), 7.82-7.92 (m, 2H), 7.67-7.69 (m, 1H), 7.09-7.35 (m, 15H), 6.55 (s, 1H), 6.21-6.24 (m, 1H), 6.01 (s, 1H), 5.40-5.44 (m, 3H), 5.30 (s, 2H), 5.16 (s, 1H), 4.98-5.03 (m, 1H), 4.72-4.77 (m, 1H), 4.58-4.61 (m, 1H), 4.43-4.50 (m, 2H), 4.13-4.30 (m, 6H), 3.29-3.31 (m, 2H), 2.97-3.06 (m, 4H), 2.83-2.91 (m, 3H), 2.56-2.78 (m, 9H), 2.23-2.43 (m, 14H), 2.09-2.16 (m, 2H), 1.85-1.94 (m, 5H), 1.23-1.79 (m, 15H), 1.03-1.08 (m, 1H), 0.86-0.90 (m, 4H), 0.76-0.78 (m, 2H). MS: calc.  $\text{M}^+ = 2142.8$ , obsvd.  $((\text{M}+2)/2)^+ = 1073.0$ .

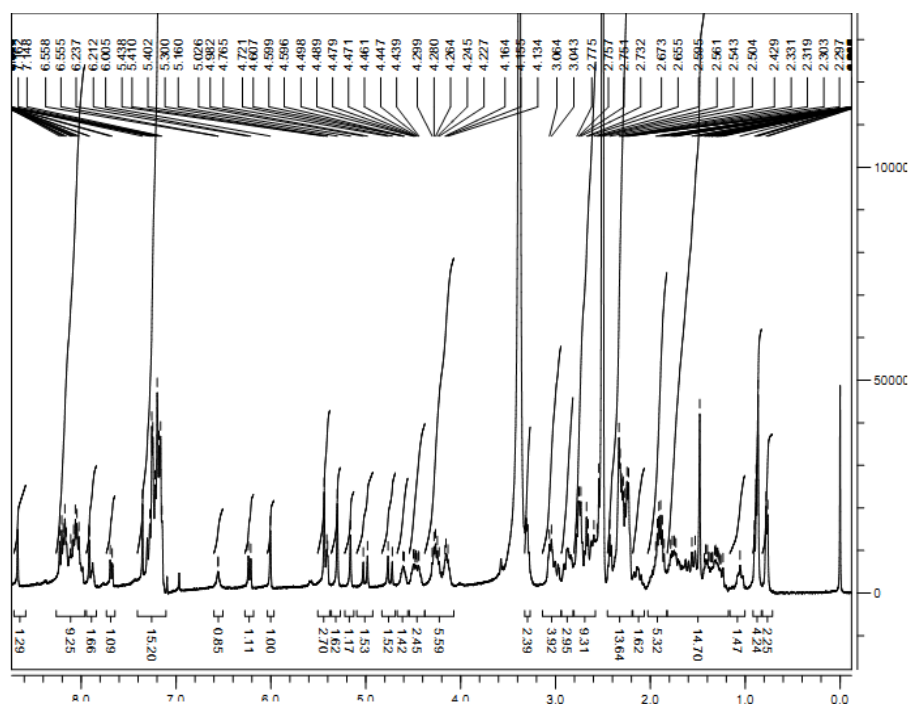

**Figure S-6.**  $^1\text{H}$  NMR of Dex-FFFK(HCPT)E-ss-EE

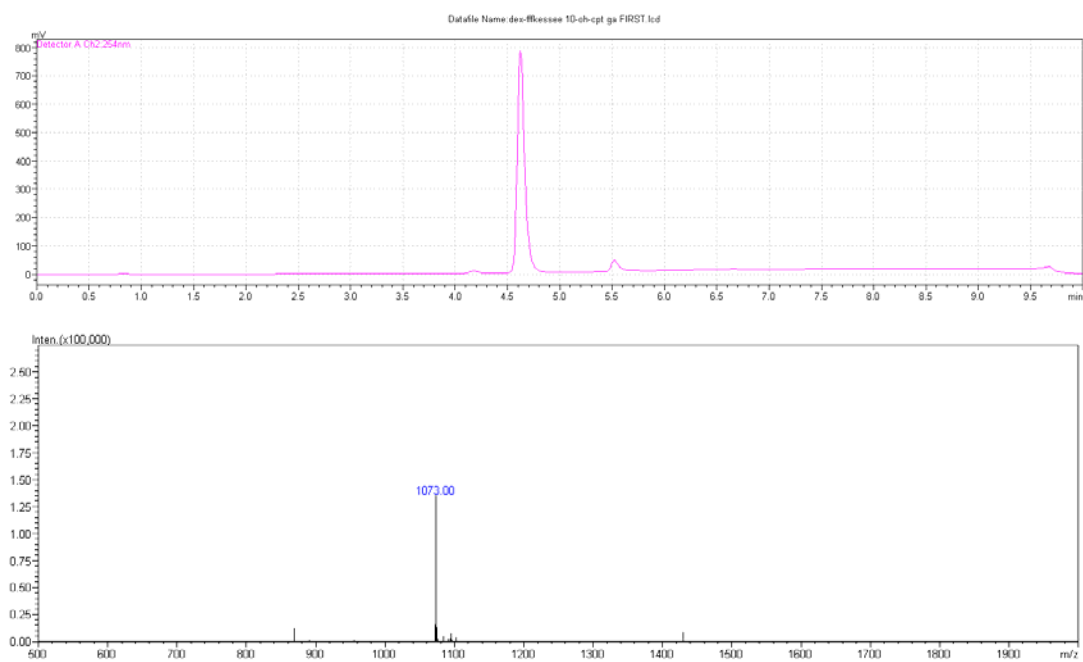

**Figure S-7.** LCMS spectrum of Dex-FFFK(HCPT)E-ss-EE

**Formation of gels:** 5 mg of Dex-FFFK(taxol/Hcpt)E-ss-EE was dissolved in 0.49 mL of PBS buffer solution (pH = 7.4). 1.0 equiv. of DTT or 2.0 equiv. of GSH in 10  $\mu\text{L}$  of PBS buffer (pH = 7.4, adjusted by  $\text{Na}_2\text{CO}_3$ ) was then added to the above solution. Gel was formed after the solution being kept at room temperature (22-25  $^\circ\text{C}$ ) for less than 5 minutes and about 2 hours for Tgel and Hgel, respectively.

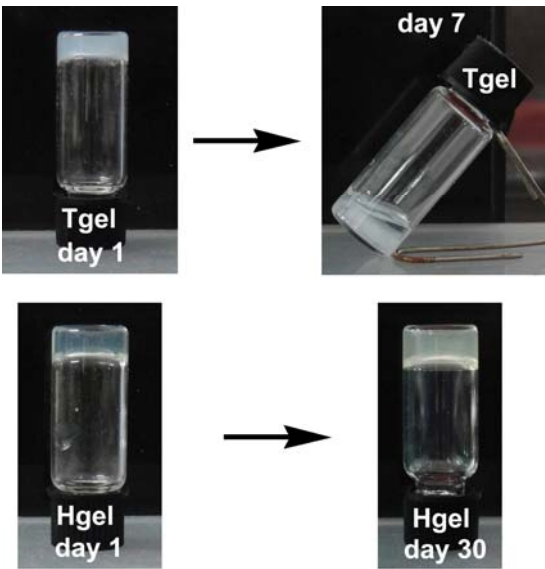

**Figure S-8.** Optical images of Tgel and Hgel at different times at room temperature (22-25 °C)

**Table S-1.** Stability of hydrogels at 37 °C

|                | Tgel    | Tgel:Hgel = 3:1 | Tgel:Hgel = 2:2 | Tgel:Hgel = 1:3 | Hgel     |
|----------------|---------|-----------------|-----------------|-----------------|----------|
| without BSA    | ~2 days | ~4 days         | ~7 days         | >2 weeks        | >2 weeks |
| with BSA (50%) | ~7 days | >2 weeks        | >2 weeks        | >2 weeks        | >2 weeks |

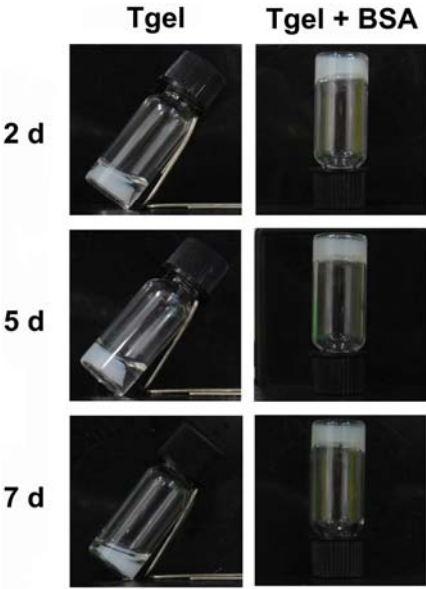

**Figure S-9.** Optical images of Tgel with or without BSA (50% wt to Dex-FFFK(Taxol)E-ss-EE) at different times and at 37 °C



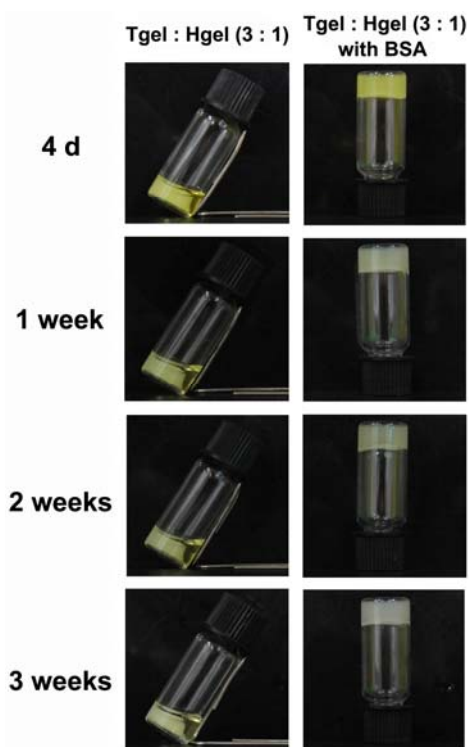

**Figure S-10.** Optical images of mixed gels (Tgel : Hgel = 3 : 1) with or without BSA (50% wt to precursors of gelators) at different times and at 37 °C

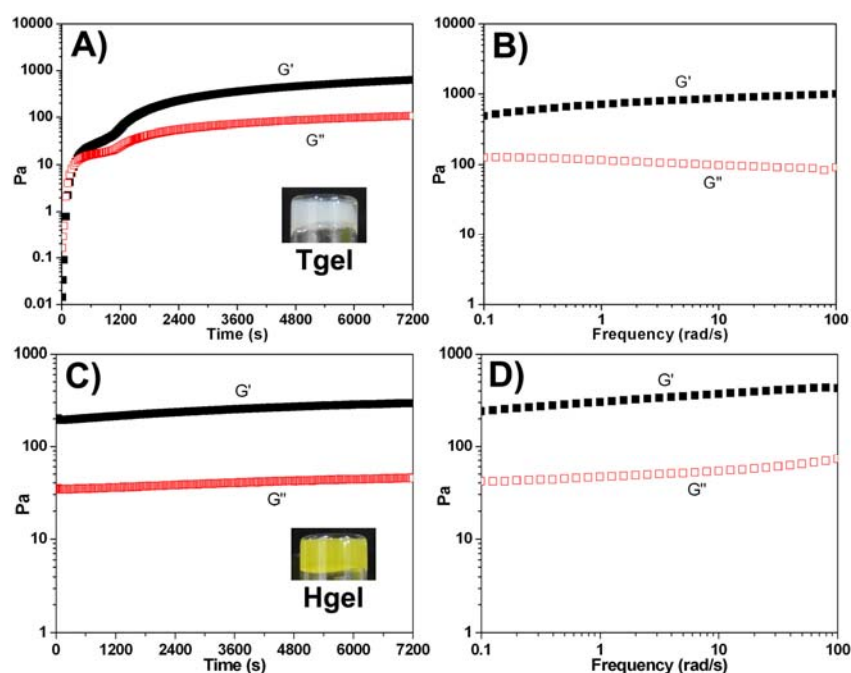

**Fig. S-11.** Rheological measurements at 37 °C with the mode of dynamic time sweep at the frequency of 2 rad/s and the strain of 1% for the PBS solutions containing 1.0% wt of A) Dex-FFFK(Taxol)E-ss-EE and C) Dex-FFFK(HCPT)E-ss-EE (incubated for one hour before measurement) with 1.0 equiv. of DTT and dynamic frequency sweep at the strain of 1% for the resulting gels: B) Tgel and D) Hgel

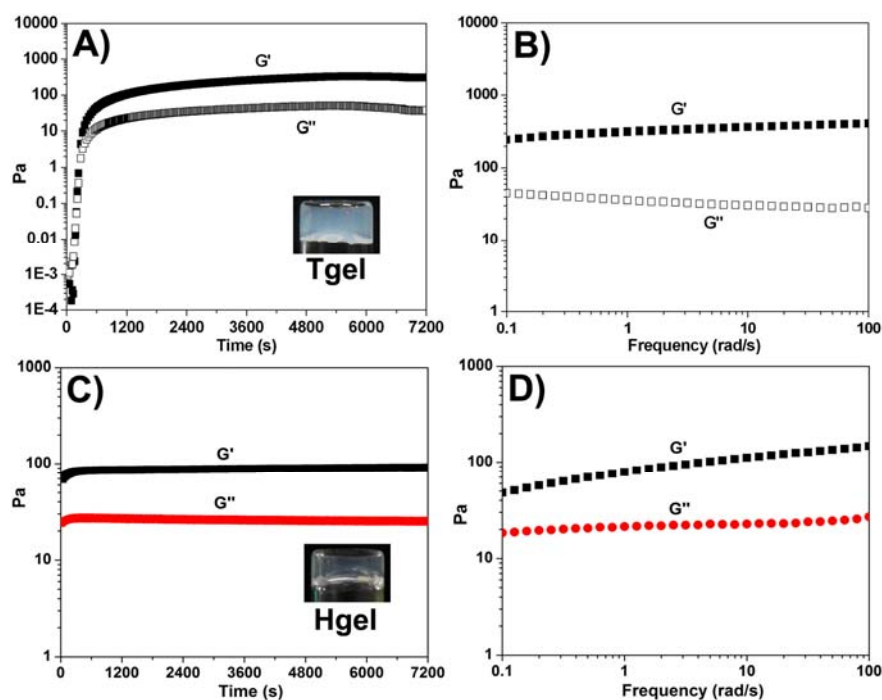

**Figure S-12.** Rheological measurements at room temperature with the mode of dynamic time sweep at the frequency of 2 rad/s and the strain of 1% for the PBS solutions containing 1.0 wt% of A) Dex-FFFK(Taxol)E-ss-EE and C) Dex-FFFK(HCPT)E-ss-EE (incubated for 2 hours before measurement) with 1.0 equiv. of DTT and dynamic frequency sweep at the strain of 1% for the resulting gels: B) Tgel and D) Hgel

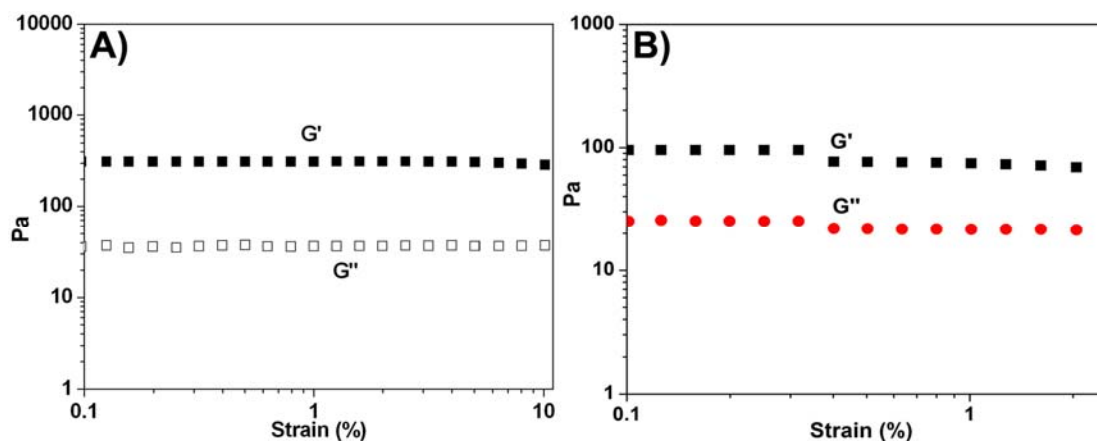

**Figure S-13.** Dynamic strain sweep of A) Tgel and B) Hgel at room temperature

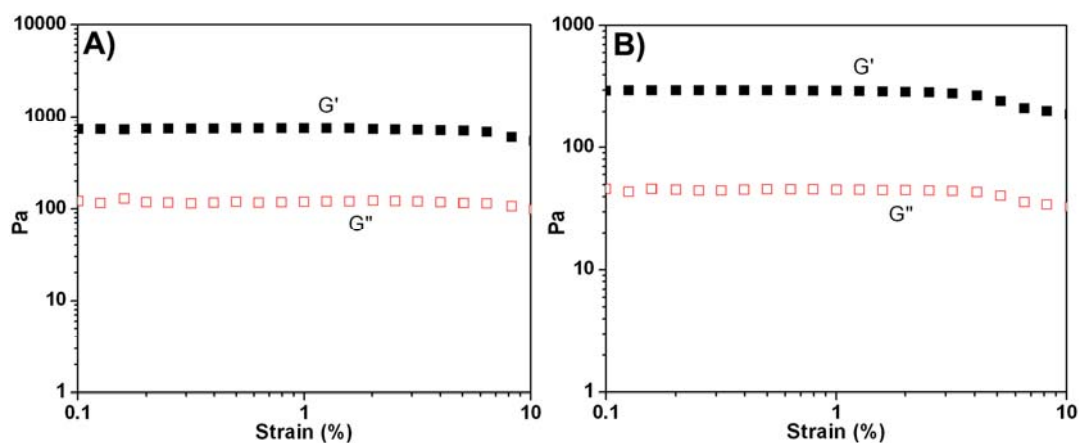

**Figure S-14.** Dynamic strain sweep of A) Tgel and B) Hgel at 37 °C

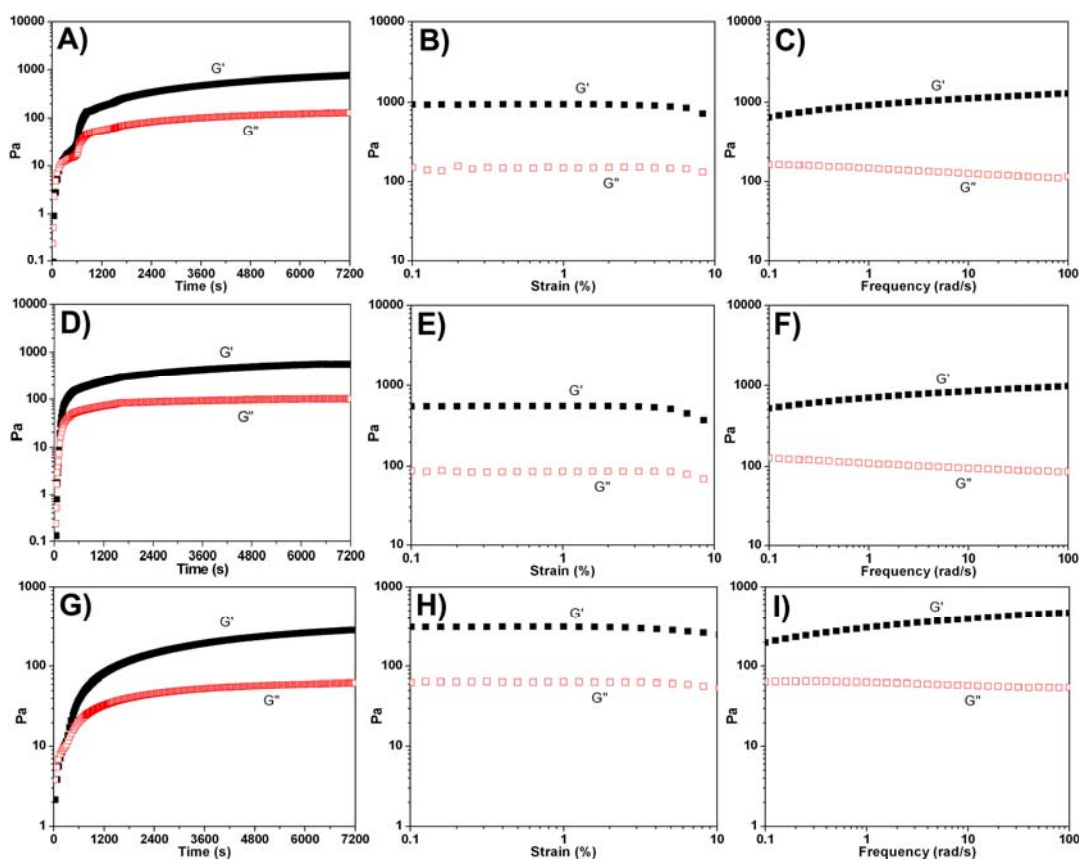

**Figure S-15.** Rheological measurements of mixed gels at 37 °C with the mode of dynamic time sweep at the frequency of 2 rad/s and the strain of 1% (A, D and G), with the mode of dynamic strain sweep at the frequency of 2 rad/s (B, E and H) and with the mode of dynamic frequency sweep at the strain of 1% (C, F and I), Tgel : Hgel = 3 : 1 (A, B and C), Tgel : Hgel = 2 : 2 (D, E and F) and Tgel : Hgel = 1 : 3 (G, H and I)

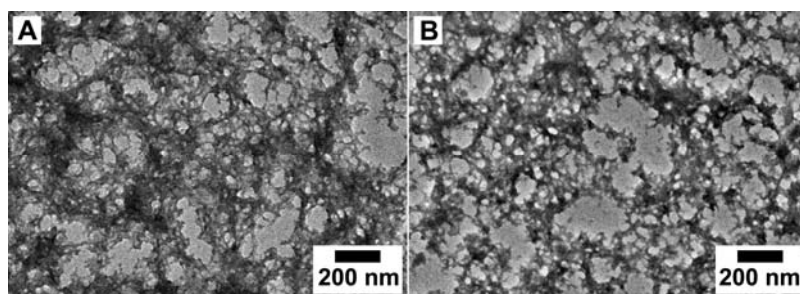

**Fig. S-16.** TEM images of A) Tgel and B) Hgel

**Release profile of anti-cancer drugs:** 0.4 mL of gels (1.0 wt%, 4 hours after the addition of DTT) was treated with 0.4 mL of fresh PBS buffer solutions (pH = 7.4). 0.4 mL of the upper buffer solution was taken out and used to run LC-MS at each time. The areas of peaks in LC-MS spectra were used to determine the percentage of Taxol or HCPT released from their corresponding gels. The experiment was conducted in 4 parallel experiments. The experiments were conducted at both room temperature (22-25 °C) and 37 °C.

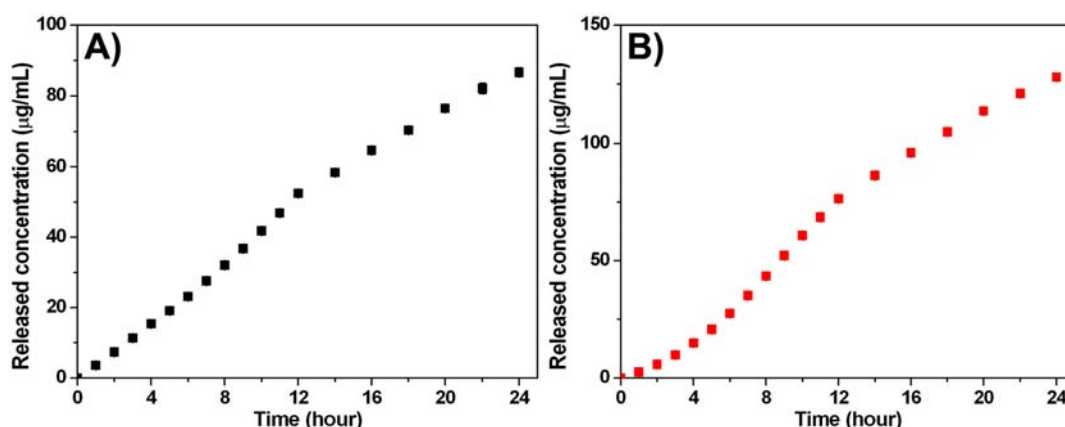

**Figure S-17.** Accumulative release profile of Taxol and HCPT from A) Tgel and B) Hgel, respectively, in 100 mM PBS buffers (pH = 7.4) and at room temperature

#### **Description of Figure S-17 and S-18:**

We only observed original drug molecules of Dex, Taxol, and HCPT releasing from the gels due to the hydrolysis of ester bond. There were no drug molecules conjugated with peptides released to upper PBS buffer solutions, suggesting the existence of extensive hydrogen bonds between peptides that could prevent peptide conjugates releasing to the upper solutions. The Tgel and Hgel released Taxol and HCPT at rates of about 3.61 µg/mL (0.11%) and about 5.33 µg/mL (0.31%) per hour in the first 24 hours, respectively. These preliminary results demonstrated the sustained release of original anti-cancer drugs from hydrogels. After the release experiments, we dissolved the gels and used them to run LC-MS. There were nearly equal molar percentage of the gelator (Dex-FFFK(Taxol)E) and dimer of it in Tgel. For Hgel,

the gelator of Dex-FFFK(HCPT)E and its dimer with a molar ratio of 1:3 were the two major components. The different components (precursor, gelator, and dimer of gelator) in both gels were probably due to the different gelation kinetics, as shown in Figure S-11A and 11C.

**Table S-2.** Original data of amounts of Taxol released from Tgel at room temperature

| T = 22-25 III | T <sub>gel</sub>      |         |                |         |
|---------------|-----------------------|---------|----------------|---------|
| Time (hour)   | Concentration (µg/mL) | error   | Percentage (%) | error   |
| 1             | 3.64043               | 0.13414 | 0.11165        | 0.00411 |
| 2             | 7.39139               | 0.32414 | 0.22669        | 0.00994 |
| 3             | 11.37972              | 0.38621 | 0.34901        | 0.01184 |
| 4             | 15.38631              | 0.39822 | 0.47189        | 0.01221 |
| 5             | 19.09195              | 0.08945 | 0.58554        | 0.00274 |
| 6             | 23.18691              | 0.18773 | 0.71113        | 0.00576 |
| 7             | 27.63074              | 0.55251 | 0.84742        | 0.01695 |
| 8             | 32.10229              | 0.11207 | 0.98456        | 0.00344 |
| 9             | 36.82164              | 0.10808 | 1.1293         | 0.00331 |
| 10            | 41.78945              | 0.19292 | 1.28166        | 0.00592 |
| 11            | 46.97082              | 0.24316 | 1.44057        | 0.00746 |
| 12            | 52.49782              | 0.81933 | 1.61008        | 0.02513 |
| 14            | 58.42228              | 0.16382 | 1.79178        | 0.00502 |
| 16            | 64.71975              | 0.29193 | 1.98492        | 0.00895 |
| 18            | 70.47792              | 0.31584 | 2.16152        | 0.00969 |
| 20            | 76.39292              | 0.17542 | 2.34293        | 0.00538 |
| 22            | 82.04577              | 1.50055 | 2.5163         | 0.04602 |
| 24            | 86.60079              | 1.25781 | 2.656          | 0.03858 |

calculated from 4 parallel experiments

**Table S-3.** Original data of amounts of HCPT released from Hgel at room temperature

| T = 22-25 III | H <sub>gel</sub>      |         |                |         |
|---------------|-----------------------|---------|----------------|---------|
| Time (hour)   | Concentration (µg/mL) | error   | Percentage (%) | error   |
| 1             | 2.55939               | 0.06069 | 0.15077        | 0.00358 |
| 2             | 5.81377               | 0.20232 | 0.34248        | 0.01192 |
| 3             | 9.88704               | 0.22381 | 0.58243        | 0.01318 |
| 4             | 14.91383              | 0.083   | 0.87855        | 0.00489 |
| 5             | 20.68041              | 0.07432 | 1.21825        | 0.00438 |
| 6             | 27.52255              | 0.40589 | 1.62131        | 0.02391 |
| 7             | 35.08124              | 0.20249 | 2.06658        | 0.01193 |
| 8             | 43.39312              | 0.20309 | 2.55622        | 0.01196 |
| 9             | 52.11038              | 0.14674 | 3.06974        | 0.00864 |
| 10            | 60.70084              | 0.3639  | 3.57579        | 0.02144 |
| 11            | 68.71582              | 0.24079 | 4.04794        | 0.01418 |
| 12            | 76.531                | 0.35643 | 4.50832        | 0.021   |
| 14            | 86.39394              | 0.45795 | 5.08933        | 0.02698 |
| 16            | 96.0362               | 0.07131 | 5.65734        | 0.0042  |

|    |           |         |         |         |
|----|-----------|---------|---------|---------|
| 18 | 104.92542 | 0.29345 | 6.18099 | 0.01729 |
| 20 | 113.55203 | 0.3323  | 6.68917 | 0.01958 |
| 22 | 121.01056 | 0.33702 | 7.12854 | 0.01985 |
| 24 | 127.88055 | 0.05069 | 7.53324 | 0.00299 |

calculated from 4 parallel experiments

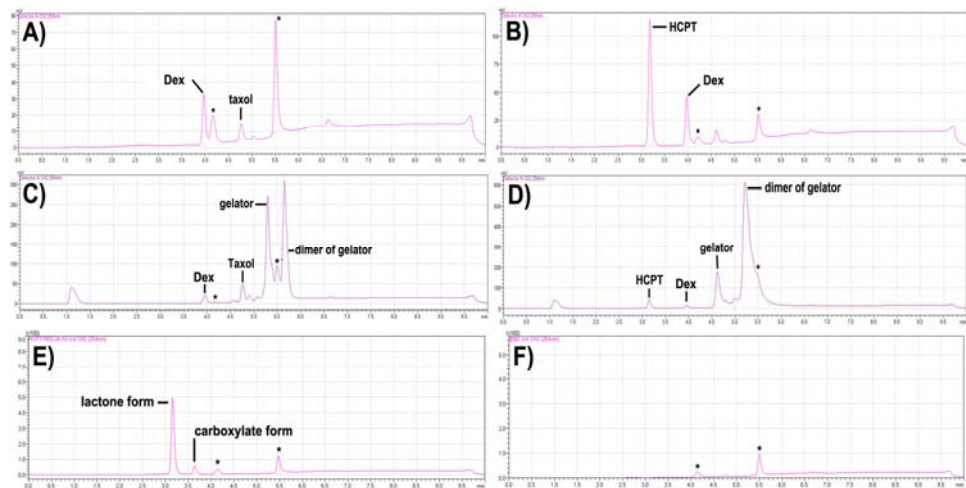

**Figure S-18** HPLC traces of A) a representative PBS buffer in release profile on top of Tgel, B) a representative PBS buffer in release profile on top of Hgel, C) Tgel after release profile, D) Hgel after release profile, E) HCPT after being incubated in PBS buffer (pH = 7.4) for 24 hours, and F) blank to indicate the system peaks (by stars)

**Table S-4.** Original data of amounts of Taxol released from Tgel at 37 °C

| T = 37 III | T <sub>gel</sub>      |         |                |         |
|------------|-----------------------|---------|----------------|---------|
|            | Concentration (µg/mL) | error   | Percentage (%) | error   |
| 1          | 2.23441               | 0.31909 | 0.06853        | 0.00979 |
| 2          | 4.96642               | 0.27531 | 0.15232        | 0.00844 |
| 3          | 11.92094              | 0.49523 | 0.36561        | 0.01519 |
| 4          | 16.4431               | 1.15866 | 0.5043         | 0.03554 |
| 5          | 22.33497              | 1.09001 | 0.685          | 0.03343 |
| 6          | 24.957                | 0.70303 | 0.76542        | 0.02156 |
| 7          | 29.59698              | 2.13716 | 0.90772        | 0.06555 |
| 8          | 34.26288              | 3.3437  | 1.05082        | 0.10255 |
| 9          | 37.47801              | 3.36823 | 1.14943        | 0.1033  |
| 10         | 42.78435              | 4.49243 | 1.31217        | 0.13778 |
| 11         | 46.2575               | 3.65098 | 1.41869        | 0.11197 |
| 12         | 49.80827              | 4.22518 | 1.52759        | 0.12958 |
| 14         | 53.56349              | 5.19698 | 1.64276        | 0.15939 |
| 16         | 56.9129               | 5.23632 | 1.74549        | 0.1606  |

|    |          |         |         |         |
|----|----------|---------|---------|---------|
| 18 | 60.89713 | 5.37087 | 1.86768 | 0.16472 |
| 20 | 64.67783 | 5.3556  | 1.98363 | 0.16425 |
| 22 | 69.0811  | 4.25555 | 2.11868 | 0.13052 |
| 24 | 72.36934 | 4.33167 | 2.21953 | 0.13285 |

calculated from 4 parallel experiments

**Table S-5.** Original data of amounts of Taxol released from mixed gel of Tgel : Hgel = 3 : 1 at 37 °C

| T = 37 III  | T <sub>gel</sub> : H <sub>gel</sub> = 3 : 1 |         |                |         |
|-------------|---------------------------------------------|---------|----------------|---------|
| Time (hour) | Concentration (µg/mL)                       | error   | Percentage (%) | error   |
| 1           | 1.32191                                     | 0.24707 | 0.0516         | 0.00964 |
| 2           | 2.64451                                     | 0.36099 | 0.10322        | 0.01409 |
| 3           | 4.35396                                     | 0.36774 | 0.16994        | 0.01435 |
| 4           | 6.31269                                     | 0.35749 | 0.2464         | 0.01395 |
| 5           | 7.35992                                     | 0.36137 | 0.28727        | 0.0141  |
| 6           | 11.70553                                    | 0.78252 | 0.45689        | 0.03054 |
| 7           | 14.84394                                    | 1.88409 | 0.57939        | 0.07354 |
| 8           | 17.78556                                    | 1.16982 | 0.69421        | 0.04566 |
| 9           | 20.40459                                    | 0.24936 | 0.79643        | 0.00973 |
| 10          | 22.65772                                    | 1.69682 | 0.88438        | 0.06623 |
| 11          | 24.7713                                     | 3.64893 | 0.96687        | 0.14243 |
| 12          | 26.07617                                    | 4.50798 | 1.01781        | 0.17596 |
| 14          | 28.26084                                    | 4.05023 | 1.10308        | 0.15809 |
| 16          | 29.88438                                    | 3.93129 | 1.16645        | 0.15345 |
| 18          | 32.51036                                    | 5.59002 | 1.26894        | 0.21819 |
| 20          | 34.36641                                    | 5.46752 | 1.34139        | 0.21341 |
| 22          | 35.96734                                    | 5.38315 | 1.40388        | 0.21011 |
| 24          | 38.45123                                    | 5.50012 | 1.50083        | 0.21468 |

calculated from 4 parallel experiments

**Table S-6.** Original data of amounts of Taxol released from mixed gel of Tgel : Hgel = 2 : 2 at 37 °C

| T = 37 III  | T <sub>gel</sub> : H <sub>gel</sub> = 2 : 2 |         |                |         |
|-------------|---------------------------------------------|---------|----------------|---------|
| Time (hour) | Concentration (µg/mL)                       | error   | Percentage (%) | error   |
| 1           | 0.62984                                     | 0.58857 | 0.03512        | 0.03282 |
| 2           | 1.43506                                     | 1.0042  | 0.08002        | 0.05599 |
| 3           | 2.76495                                     | 1.68998 | 0.15417        | 0.09423 |
| 4           | 4.62266                                     | 2.54626 | 0.25776        | 0.14198 |
| 5           | 7.39152                                     | 1.48109 | 0.41215        | 0.08259 |
| 6           | 9.45213                                     | 3.08341 | 0.52705        | 0.17193 |
| 7           | 13.97818                                    | 2.45605 | 0.77942        | 0.13695 |



|    |          |         |         |         |
|----|----------|---------|---------|---------|
| 8  | 18.3997  | 1.30379 | 1.02597 | 0.0727  |
| 9  | 23.30551 | 1.54661 | 1.29952 | 0.08624 |
| 10 | 24.50251 | 2.28228 | 1.36626 | 0.12726 |
| 11 | 26.33977 | 5.0376  | 1.46871 | 0.2809  |
| 12 | 27.74697 | 4.98641 | 1.54717 | 0.27804 |
| 14 | 28.32112 | 5.48421 | 1.57919 | 0.3058  |
| 16 | 30.65807 | 5.02856 | 1.70949 | 0.28039 |
| 18 | 31.59808 | 5.6851  | 1.76191 | 0.317   |
| 20 | 33.02555 | 6.60529 | 1.84151 | 0.36831 |
| 22 | 34.09374 | 6.97273 | 1.90107 | 0.3888  |
| 24 | 35.10414 | 7.63444 | 1.95741 | 0.4257  |

calculated from 4 parallel experiments

**Table S-7.** Original data of amounts of Taxol released from mixed gel of Tgel : Hgel = 1 : 3 at 37 °C

| T = 37 III  | T <sub>gel</sub> : H <sub>gel</sub> = 1 : 3 |          |                |         |
|-------------|---------------------------------------------|----------|----------------|---------|
| Time (hour) | Concentration (µg/mL)                       | error    | Percentage (%) | error   |
| 1           | 3.34787                                     | 0.59166  | 0.35638        | 0.06298 |
| 2           | 6.69575                                     | 1.18333  | 0.71277        | 0.12597 |
| 3           | 10.28923                                    | 2.19521  | 1.0953         | 0.23368 |
| 4           | 13.14818                                    | 2.59247  | 1.39964        | 0.27597 |
| 5           | 15.06281                                    | 2.22504  | 1.60345        | 0.23686 |
| 6           | 17.85007                                    | 4.05684  | 1.90016        | 0.43185 |
| 7           | 20.57821                                    | 3.45167  | 2.19057        | 0.36743 |
| 8           | 25.00849                                    | 6.67358  | 2.66218        | 0.71041 |
| 9           | 26.14994                                    | 6.70271  | 2.78369        | 0.71351 |
| 10          | 27.66909                                    | 7.45728  | 2.9454         | 0.79383 |
| 11          | 28.69875                                    | 8.57447  | 3.05501        | 0.91276 |
| 12          | 30.33004                                    | 8.06904  | 3.22866        | 0.85896 |
| 14          | 37.29262                                    | 8.32934  | 3.96983        | 0.88667 |
| 16          | 38.14102                                    | 9.12079  | 4.06015        | 0.97092 |
| 18          | 41.05926                                    | 11.71626 | 4.3708         | 1.24721 |
| 20          | 44.84698                                    | 12.62636 | 4.774          | 1.34409 |
| 22          | 46.99473                                    | 12.53223 | 5.00263        | 1.33407 |
| 24          | 49.28205                                    | 10.67773 | 5.24612        | 1.13665 |

calculated from 4 parallel experiments

**Table S-8.** Original data of amounts of HCPT released from Hgel at 37 °C

| T = 37 III  | H <sub>gel</sub>      |       |            |       |
|-------------|-----------------------|-------|------------|-------|
| Time (hour) | Concentration (µg/mL) | error | Percentage | error |

|    |           |          | (%)      |         |
|----|-----------|----------|----------|---------|
| 1  | 159.55775 | 1.99509  | 9.39929  | 0.11753 |
| 2  | 275.55902 | 8.77752  | 16.23274 | 0.51707 |
| 3  | 366.56698 | 3.66709  | 21.59388 | 0.21602 |
| 4  | 426.13876 | 2.80524  | 25.10316 | 0.16525 |
| 5  | 464.85797 | 7.12935  | 27.38405 | 0.41998 |
| 6  | 490.7525  | 9.68388  | 28.90945 | 0.57046 |
| 7  | 508.66356 | 10.96424 | 29.96456 | 0.64589 |
| 8  | 522.36382 | 11.91126 | 30.77162 | 0.70167 |
| 9  | 533.49881 | 12.64768 | 31.42757 | 0.74505 |
| 10 | 543.53608 | 12.45667 | 32.01885 | 0.7338  |
| 11 | 552.27586 | 12.32845 | 32.53369 | 0.72625 |
| 12 | 560.40946 | 12.50892 | 33.01283 | 0.73688 |
| 14 | 570.1835  | 12.67368 | 33.58861 | 0.74659 |
| 16 | 580.62334 | 13.50401 | 34.2036  | 0.7955  |
| 18 | 590.21742 | 14.31938 | 34.76877 | 0.84353 |
| 20 | 597.79694 | 14.7495  | 35.21527 | 0.86887 |
| 22 | 603.66925 | 15.26872 | 35.5612  | 0.89946 |
| 24 | 608.66094 | 15.61569 | 35.85525 | 0.9199  |

calculated from 4 parallel experiments

**Table S-9.** Original data of amounts of HCPT released from mixed gel of Tgel : Hgel = 3 : 1 at 37 °C

| T = 37 °C   | T <sub>gel</sub> : H <sub>gel</sub> = 3 : 1 |         |                |         |
|-------------|---------------------------------------------|---------|----------------|---------|
| Time (hour) | Concentration (µg/mL)                       | error   | Percentage (%) | error   |
| 1           | 77.92871                                    | 2.76278 | 21.40899       | 0.75901 |
| 2           | 128.57565                                   | 2.32656 | 35.32298       | 0.63917 |
| 3           | 160.9704                                    | 2.43606 | 44.22264       | 0.66925 |
| 4           | 180.74868                                   | 2.31367 | 49.65623       | 0.63562 |
| 5           | 192.83736                                   | 2.30637 | 52.9773        | 0.63362 |
| 6           | 200.6798                                    | 2.32558 | 55.13181       | 0.6389  |
| 7           | 205.33562                                   | 2.33259 | 56.41088       | 0.64082 |
| 8           | 208.2595                                    | 2.22144 | 57.21415       | 0.61029 |
| 9           | 210.01601                                   | 2.30042 | 57.69671       | 0.63198 |
| 10          | 211.08642                                   | 2.28355 | 57.99077       | 0.62735 |
| 11          | 211.73808                                   | 2.27177 | 58.1698        | 0.62411 |
| 12          | 212.03605                                   | 2.2692  | 58.25166       | 0.62341 |
| 14          | 212.296                                     | 2.32353 | 58.32308       | 0.63833 |
| 16          | 212.41359                                   | 2.25696 | 58.35538       | 0.62004 |
| 18          | 212.51404                                   | 2.242   | 58.38298       | 0.61593 |
| 20          | 212.51677                                   | 2.23822 | 58.38373       | 0.6149  |

|    |           |         |          |        |
|----|-----------|---------|----------|--------|
| 22 | 212.51677 | 2.23822 | 58.38373 | 0.6149 |
| 24 | 212.51677 | 2.23822 | 58.38373 | 0.6149 |

calculated from 4 parallel experiments

**Table S-10.** Original data of amounts of HCPT released from mixed gel of Tgel : Hgel = 2 : 2 at 37 °C

| T = 37 III  | T <sub>gel</sub> : H <sub>gel</sub> = 2 : 2 |         |                |         |
|-------------|---------------------------------------------|---------|----------------|---------|
| Time (hour) | Concentration (µg/mL)                       | error   | Percentage (%) | error   |
| 1           | 146.62364                                   | 2.54429 | 19.18153       | 0.33285 |
| 2           | 250.50102                                   | 4.49635 | 32.77093       | 0.58822 |
| 3           | 317.77242                                   | 5.3926  | 41.57148       | 0.70547 |
| 4           | 359.12928                                   | 5.84899 | 46.98185       | 0.76517 |
| 5           | 384.13458                                   | 5.998   | 50.25308       | 0.78467 |
| 6           | 399.60707                                   | 6.22953 | 52.27722       | 0.81496 |
| 7           | 408.68727                                   | 6.53494 | 53.46511       | 0.85491 |
| 8           | 414.36228                                   | 6.61792 | 54.20752       | 0.86577 |
| 9           | 417.79674                                   | 6.65959 | 54.65682       | 0.87122 |
| 10          | 419.76076                                   | 6.74311 | 54.91376       | 0.88214 |
| 11          | 421.03346                                   | 6.8292  | 55.08025       | 0.89341 |
| 12          | 421.84122                                   | 6.77385 | 55.18593       | 0.88617 |
| 14          | 422.33487                                   | 6.77762 | 55.25051       | 0.88666 |
| 16          | 422.73995                                   | 6.80685 | 55.3035        | 0.89048 |
| 18          | 422.99924                                   | 6.80183 | 55.33742       | 0.88983 |
| 20          | 423.1784                                    | 6.85308 | 55.36086       | 0.89653 |
| 22          | 423.24837                                   | 6.84149 | 55.37001       | 0.89501 |
| 24          | 423.29952                                   | 6.8375  | 55.3767        | 0.89449 |

calculated from 4 parallel experiments

**Table S-11.** Original data of amounts of HCPT released from mixed gel of Tgel : Hgel = 1 : 3 at 37 °C

| T = 37 III  | T <sub>gel</sub> : H <sub>gel</sub> = 1 : 3 |          |                |         |
|-------------|---------------------------------------------|----------|----------------|---------|
| Time (hour) | Concentration (µg/mL)                       | error    | Percentage (%) | error   |
| 1           | 153.7697                                    | 18.74566 | 12.73189       | 1.55211 |
| 2           | 278.59432                                   | 18.74566 | 23.06718       | 1.55211 |
| 3           | 362.64589                                   | 12.60553 | 30.02652       | 1.04372 |
| 4           | 417.03465                                   | 10.70191 | 34.52982       | 0.8861  |
| 5           | 452.9317                                    | 11.85966 | 37.50204       | 0.98196 |
| 6           | 477.30895                                   | 14.51867 | 39.52044       | 1.20212 |
| 7           | 497.79429                                   | 24.23723 | 41.2166        | 2.0068  |
| 8           | 510.76771                                   | 30.07151 | 42.29078       | 2.48987 |
| 9           | 519.26547                                   | 33.96743 | 42.99438       | 2.81245 |

|    |           |          |          |         |
|----|-----------|----------|----------|---------|
| 10 | 525.55868 | 37.55624 | 43.51545 | 3.1096  |
| 11 | 530.47014 | 40.82169 | 43.92211 | 3.37997 |
| 12 | 534.34811 | 43.63452 | 44.2432  | 3.61287 |
| 14 | 537.97263 | 46.29825 | 44.5433  | 3.83342 |
| 16 | 541.17946 | 48.66538 | 44.80882 | 4.02942 |
| 18 | 543.84996 | 50.45405 | 45.02994 | 4.17752 |
| 20 | 545.07198 | 50.439   | 45.13112 | 4.17627 |
| 22 | 546.69782 | 51.43077 | 45.26574 | 4.25839 |
| 24 | 548.1328  | 52.11974 | 45.38455 | 4.31543 |

calculated from 4 parallel experiments

**Determination of IC<sub>50</sub> values on HepG2 cells:** The HepG2 cells were seeded in a 96-well plate with the density of 3,000 cells per-well (total medium volume of 75  $\mu$ L). 24 hours post seeding, the solutions with a serial of concentrations (5 concentrations) of different compounds in 25  $\mu$ L of medium were added to each well (five wells for each concentration). Cells without the treatment of the compounds were used as the control. The MTT assays were performed after an extra culture time of 48 hours. All compounds were removed and 100  $\mu$ L fresh medium was added for each well, 20  $\mu$ L of MTT solution (5 mg/mL) was added and incubated for 4 hours in 37 °C. Pipette out the spent media, formazon crystals at the bottom of each well were dissolved in 150  $\mu$ L DMSO. After 15 minutes at room temperature, absorbance at wavelength of 490 nm was tested using a microplate reader (BIO-RAD, iMark<sup>TM</sup>). The experiment was repeated for 3 times. IC<sub>50</sub> values for the inhibition of cell viability were calculated from pharmacological inhibitory response curves using software Prism 5.0.

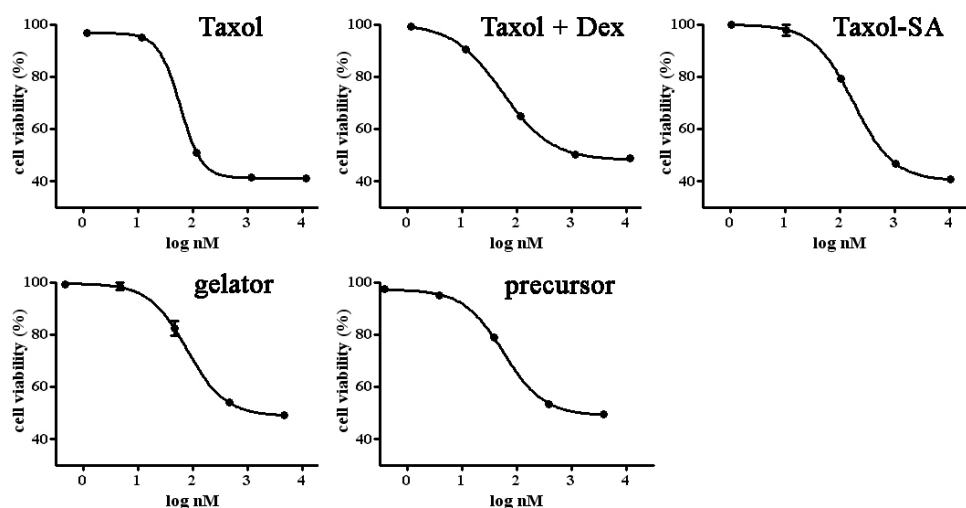

**Figure S-19.** Representative congress curve of cell inhibition of taxol-based compounds

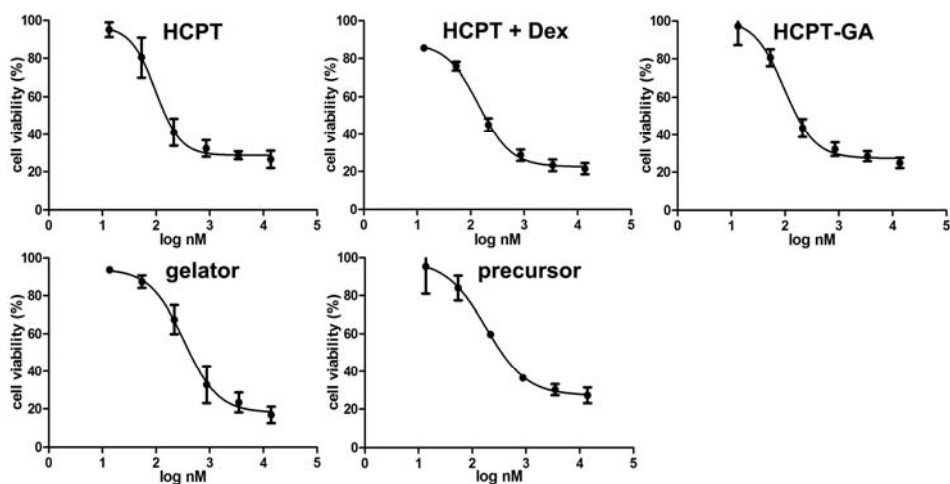

**Figure S-20.** Representative congress curve of cell inhibition of HCPT-based compounds

### Reference:

- (1) Deutsch, H. M.; Glinski, J. A.; Hernandez, M.; Haugwitz, R. D.; Narayanan, V. L.; Suffness, M.; Zalkow, L. H. In *J. Med. Chem.* 1989; Vol. 32, p 788.
- (2) Gao, Y.; Kuang, Y.; Guo, Z.-F.; Guo, Z.; Krauss, I. J.; Xu, B. *J. Am. Chem. Soc.* **2009**, *131*, 13576.
